# Supplementary material for: Assessing human-caused wildfire ignition likelihood across Europe
Source: Copernicus journal article supplement (doi:10.5194/nhess-25-4713-2025), 2025-11-28
Supplement: Supplementary file 1 [file nhess-25-4713-2025-supplement.pdf]

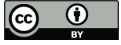

*Supplement of*

## **Assessing human-caused wildfire ignition likelihood across Europe**

**Pere Joan Gelabert et al.**

*Correspondence to:* Marcos Rodrigues (rmarcos@unizar.es)

The copyright of individual parts of the supplement might differ from the article licence.

**Table S1: List of datasets used to derivate explanatory variables**

| <b>Factor</b>                    | <b>Variable</b>                         | <b>Product</b>                                      | <b>Native Spatial resolution/Scale</b> | <b>Temporal resolution</b> | <b>Link</b>                                                                                                                                                         | <b>Post-process applied</b>                                                                                                |
|----------------------------------|-----------------------------------------|-----------------------------------------------------|----------------------------------------|----------------------------|---------------------------------------------------------------------------------------------------------------------------------------------------------------------|----------------------------------------------------------------------------------------------------------------------------|
| Human pressure and accessibility | Population density                      | GHS-POP R2023A                                      | 100                                    | 2020                       | <a href="https://data.jrc.ec.europa.eu/dataset/2ff68a52-5b5b-4a22-8f40-c41da8332cfe">https://data.jrc.ec.europa.eu/dataset/2ff68a52-5b5b-4a22-8f40-c41da8332cfe</a> | Reproject to common CRS (epsg: 3035)                                                                                       |
|                                  | Distance to roads                       | GRIP global roads database                          | 1:500000                               | 2018                       | <a href="https://www.globio.info/download-grip-dataset">https://www.globio.info/download-grip-dataset</a>                                                           | Reprojected to common CRS (epsg: 3035); Euclidean distance rasterized to 100 m.                                            |
| Wildland interfaces              | WUI/WAI/WGI                             | CLC - 2018                                          | 100                                    | 2018                       | <a href="https://doi.org/10.2909/c89324ef-7729-4477-9f1b-623f5f88ea1">https://doi.org/10.2909/c89324ef-7729-4477-9f1b-623f5f88ea1</a>                               | -                                                                                                                          |
| Land Cover                       | %Urban, %agricultural and % of Wildland | CLC - 2018                                          | 100                                    | 2018                       | <a href="https://doi.org/10.2909/c89324ef-7729-4477-9f1b-623f5f88ea1">https://doi.org/10.2909/c89324ef-7729-4477-9f1b-623f5f88ea1</a>                               | -                                                                                                                          |
| Land Cover transitions           | Landcover transition                    | CLC - 2018                                          | 100                                    | 2018                       | <a href="https://doi.org/10.2909/c89324ef-7729-4477-9f1b-623f5f88ea1">https://doi.org/10.2909/c89324ef-7729-4477-9f1b-623f5f88ea1</a>                               | -                                                                                                                          |
|                                  |                                         | CLC - 1990                                          | 100                                    | 1990                       | <a href="https://doi.org/10.2909/c89324ef-7729-4477-9f1b-623f5f88ea1">https://doi.org/10.2909/c89324ef-7729-4477-9f1b-623f5f88ea1</a>                               | -                                                                                                                          |
| Fuel types                       | Fuel Type                               | CLC+ Backbone                                       | 10                                     | 2018                       | <a href="https://doi.org/10.2909/cd534ebf-f553-42f0-9ac1-62c1dc36d32c">https://doi.org/10.2909/cd534ebf-f553-42f0-9ac1-62c1dc36d32c</a>                             | Aggregated 10 to 90 m by majority vote; Resampled to 100 m using nearest-neighbour                                         |
|                                  |                                         | CLC - 2018                                          | 100                                    | 2018                       | <a href="https://doi.org/10.2909/c89324ef-7729-4477-9f1b-623f5f88ea1">https://doi.org/10.2909/c89324ef-7729-4477-9f1b-623f5f88ea1</a>                               | -                                                                                                                          |
|                                  |                                         | Global Forest Canopy Height                         | 30                                     | 2019                       | <a href="https://glad.umd.edu/dataset/gedi/">https://glad.umd.edu/dataset/gedi/</a>                                                                                 | Reprojected to common CRS (epsg: 3035); Aggregated 30 to 90 m by majority vote; Resampled to 100 m using nearest-neighbour |
|                                  |                                         | Tree Cover Density                                  | 100                                    | 2020                       | <a href="https://doi.org/10.2909/4dc35722-09ce-427f-9a1b-775a8640da27">https://doi.org/10.2909/4dc35722-09ce-427f-9a1b-775a8640da27</a>                             | Reprojected to common CRS (epsg: 3035)                                                                                     |
| Fire weather                     | DFMC                                    | ERA5 Monthly Aggregates - Latest Climate Reanalysis | 0,1°                                   | 1991-2021                  | <a href="https://doi.org/10.24381/cds.68d2bb30">https://doi.org/10.24381/cds.68d2bb30</a>                                                                           | Resampled to 100 m and reprojected to common CRS (epsg:3035) using nearest-neighbour                                       |

**Table S2: FirEURisk fuel type classification system.**

| FirEURisk fuel type |                                           | FirEURisk fuel type |                                                 |
|---------------------|-------------------------------------------|---------------------|-------------------------------------------------|
| Code                | Description                               | Code                | Description                                     |
| 1111                | <i>Open broadleaf evergreen forest</i>    | 23                  | <i>High shrubland [<math>\geq 1.5</math> m)</i> |
| 1112                | <i>Closed broadleaf evergreen forest</i>  | 31                  | <i>Low grassland [0–0.3 m)</i>                  |
| 1121                | <i>Open broadleaf deciduous forest</i>    | 32                  | <i>Medium grassland [0.3–0.7 m)</i>             |
| 1122                | <i>Closed broadleaf deciduous forest</i>  | 33                  | <i>High grassland [<math>\geq 0.7</math> m)</i> |
| 1211                | <i>Open needleleaf evergreen forest</i>   | 41                  | <i>Herbaceous cropland</i>                      |
| 1212                | <i>Closed needleleaf evergreen forest</i> | 42                  | <i>Woody cropland</i>                           |
| 1221                | <i>Open needleleaf deciduous forest</i>   | 51                  | <i>Wet and peat/semi-peat land – tree</i>       |
| 1222                | <i>Closed needleleaf deciduous forest</i> | 52                  | <i>Wet and peat/semi-peat land – shrubland</i>  |
| 1301                | <i>Open mixed forest</i>                  | 53                  | <i>Wet and peat/semi-peat land – grassland</i>  |
| 1302                | <i>Closed mixed forest</i>                | 61                  | <i>Urban continuous fabric</i>                  |
| 21                  | <i>Low shrubland [0–0.5 m]</i>            | 62                  | <i>Urban discontinuous fabric</i>               |
| 22                  | <i>Medium shrubland [0.5–1.5 m]</i>       | 7                   | <i>Nonfuel</i>                                  |

**Table S3: Correspondence between FirEURisk fuel type classification system and the reclassification criteria.**

| <b>FM Code</b> | <b>Main Category</b>                            | <b>Forest Density (Tree Cover %)</b> | <b>CLCpl Description</b>                             | <b>CLC Description(s)</b>                                                             | <b>Global Forest Tree Height</b> |
|----------------|-------------------------------------------------|--------------------------------------|------------------------------------------------------|---------------------------------------------------------------------------------------|----------------------------------|
| <b>1111</b>    | <i>Open broadleaf evergreen forest</i>          | Open Forest (15–70%)                 | 2 - Woody needle leaved trees                        | Not Applicable                                                                        | Not Applicable                   |
| <b>1112</b>    | <i>Closed broadleaf evergreen forest</i>        | Closed Forest (>70%)                 | 2 - Woody needle leaved trees                        | Not Applicable                                                                        | Not Applicable                   |
| <b>1121</b>    | <i>Open broadleaf deciduous forest</i>          | Open Forest (15–70%)                 | 3 - Woody broadleaved deciduous trees                | Not Applicable                                                                        | Not Applicable                   |
| <b>1122</b>    | <i>Closed broadleaf deciduous forest</i>        | Closed Forest (>70%)                 | 3 - Woody broadleaved deciduous trees                | Not Applicable                                                                        | Not Applicable                   |
| <b>1211</b>    | <i>Open needleleaf evergreen forest</i>         | Open Forest (15–70%)                 | 4 - Woody broadleaved evergreen trees                | Not Applicable                                                                        | Not Applicable                   |
| <b>1212</b>    | <i>Closed needleleaf evergreen forest</i>       | Closed Forest (>70%)                 | 4 - Woody broadleaved evergreen trees                | Not Applicable                                                                        | Not Applicable                   |
| <b>21</b>      | <i>Low shrubland [0–0.5 m]</i>                  | Not Applicable                       | Not Applicable                                       | 32 - Sparsely vegetated areas                                                         | Not Applicable                   |
| <b>22</b>      | <i>Medium shrubland [0.5–1.5 m]</i>             | Not Applicable                       | Not Applicable                                       | Not Applicable                                                                        | Tree Height (0.5–1.5 m)          |
| <b>23</b>      | <i>High shrubland [<math>\geq 1.5</math> m]</i> | Not Applicable                       | Not Applicable                                       | Not Applicable                                                                        | Tree Height (1.5–3 m)            |
| <b>31</b>      | <i>Low grassland [0–0.3 m]</i>                  | Not Applicable                       | 8 - Permanent Herbaceous                             | 26 - Natural grasslands                                                               | Not Applicable                   |
| <b>32</b>      | <i>Medium grassland [0.3–0.7 m]</i>             | Not Applicable                       | 8 - Permanent Herbaceous                             | 18 - Pastures                                                                         | Not Applicable                   |
| <b>7</b>       | <i>Nonfuel</i>                                  | Not Applicable                       | 9,10 &11 - Non-and sparsely vegetated & water bodies | 13–17, 20 - Irrigated land, vineyards, fruit trees, olive groves, complex cultivation | Not Applicable                   |
| <b>61</b>      | <i>Urban continuous fabric</i>                  | Not Applicable                       | Not Applicable - Not Applicable                      | 1 - Continuous urban fabric                                                           | Not Applicable                   |
| <b>62</b>      | <i>Urban discontinuous fabric</i>               | Not Applicable                       | Not Applicable - Not Applicable                      | 2–11 - Discontinuous urban, industrial, transport, leisure                            | Not Applicable                   |

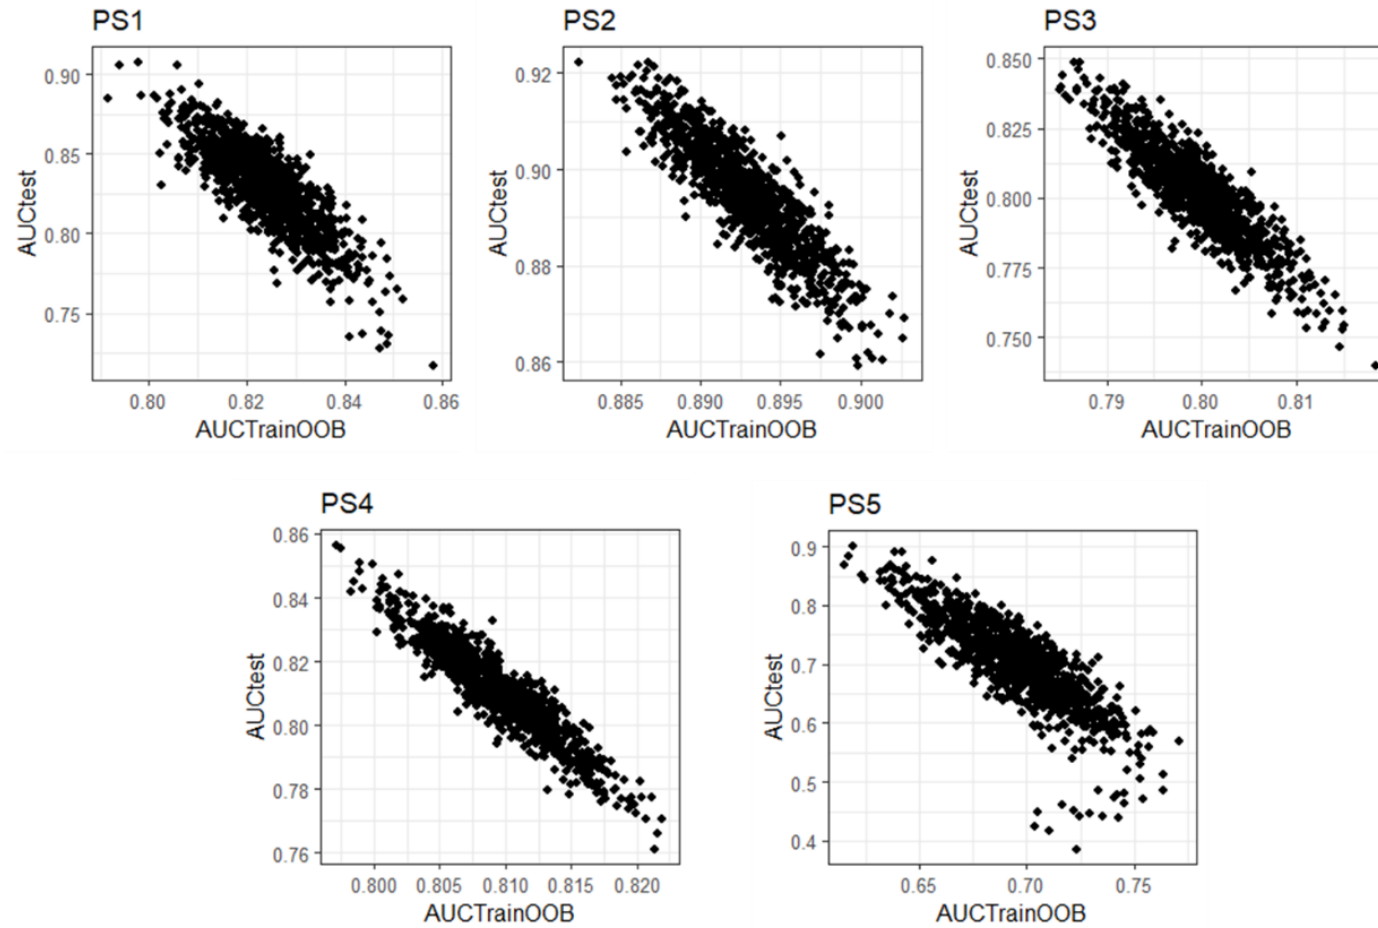

Figure S1: Relation of AUC with independent sample and AUC derived from Out-of-bag (OOB) subsample
